# Supplementary material for: Tspan8 Drives Melanoma Dermal Invasion by Promoting ProMMP-9 Activation and Basement Membrane Proteolysis in a Keratinocyte-Dependent Manner
Source: PubMed Central journal article supplement (PMC7281247; doi:10.3390/cancers12051297), 2020-05-21

# Supplementary Materials: Tspan8 Drives Melanoma Dermal Invasion by Promoting ProMMP-9 Activation and Basement Membrane Proteolysis in a Keratinocyte-Dependent Manner

Manale El Kharbili, Muriel Cario, Nicolas Béchetoille, Catherine Pain, Claude Boucheix, Françoise Degoul, Ingrid Masse and Odile Berthier-Vergnes

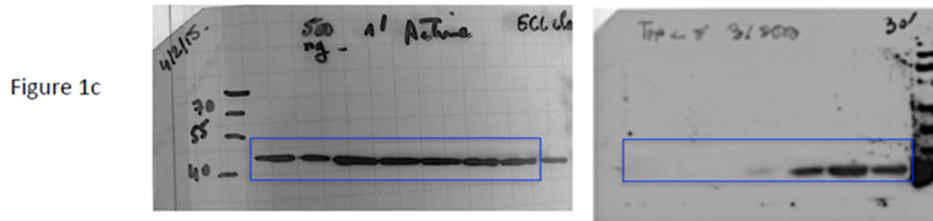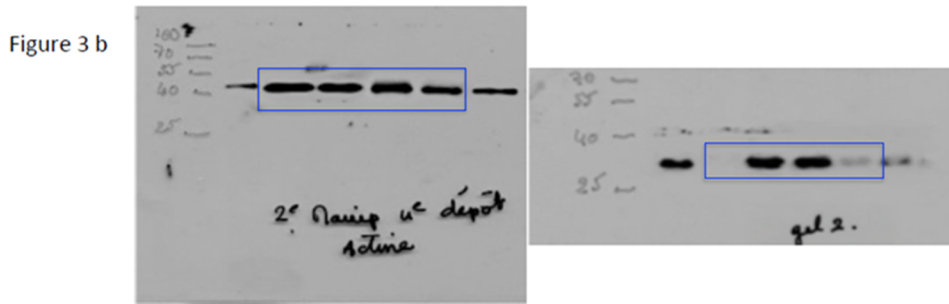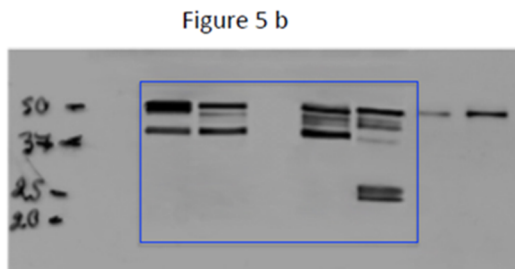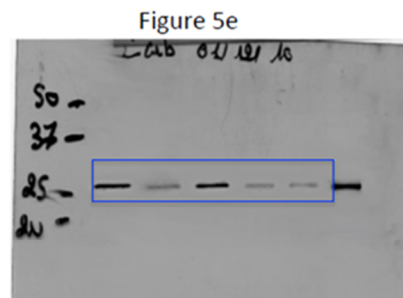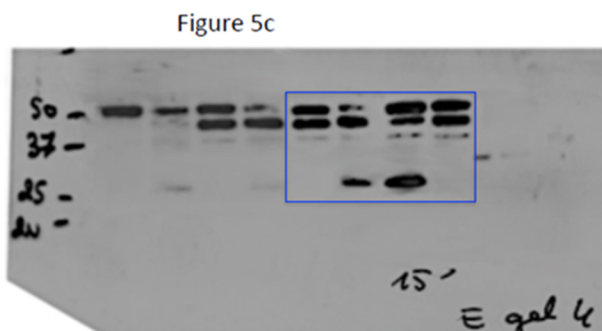

Figure S1. Uncropped western blot figures.

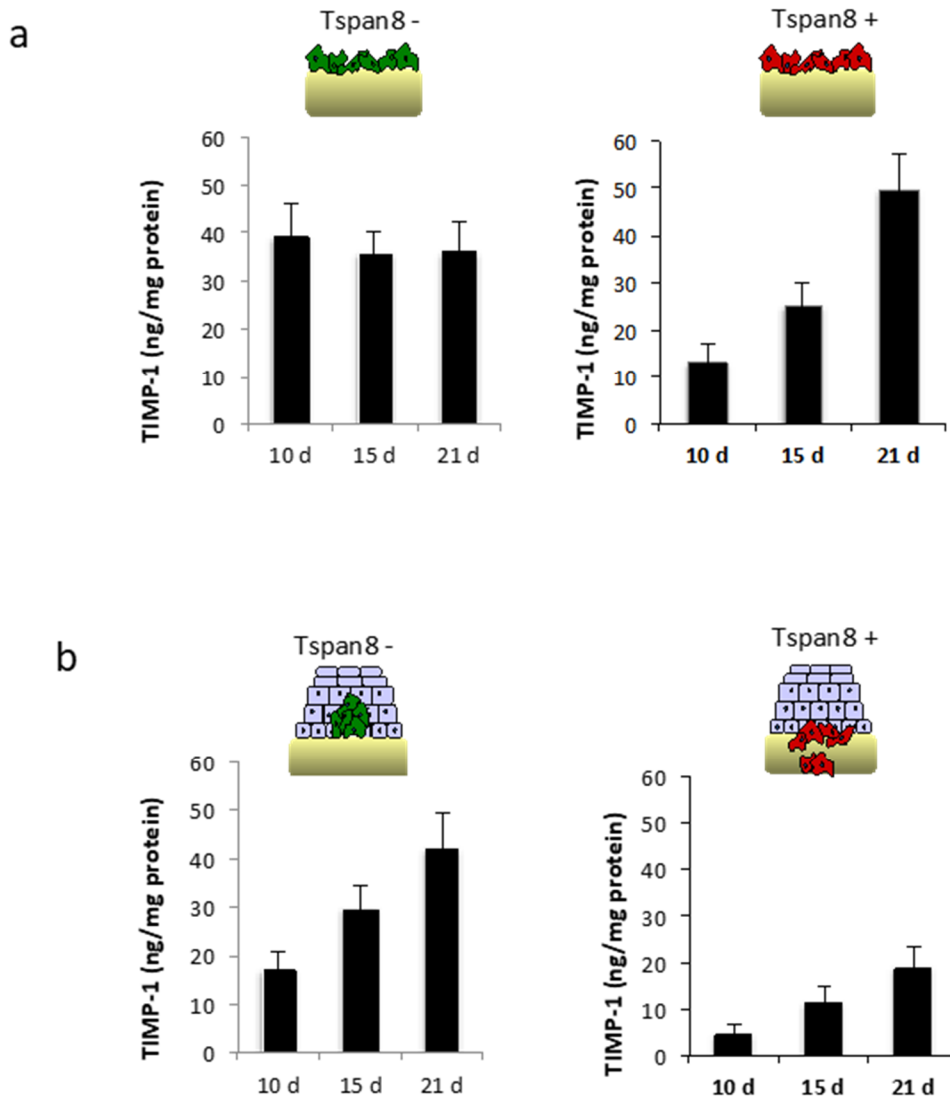

**Figure S2.** Low TIMP-1 levels were exclusively observed when melanoma cells expressed Tspan8 and were integrated into SR. **(a,b)** Supernatants TIMP-1 protein levels were measured at day 10, 15 and 21 by ELISA in composites consisting of melanoma cells expressing or not Tspan8 cultured on acellular dermis either alone **(a)** or with human keratinocytes **(b)**. Results are represented as the mean  $\pm$  SEM from three independent experiments.

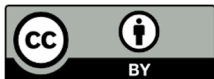

Supplement: cancers-12-01297-s001.pdf [file cancers-12-01297-s001.pdf]
